# Supplementary material for: Physiological, nutritional, and molecular responses of Brazilian sugarcane cultivars under stress by aluminum
Source: PeerJ. 2021 Jun 28;9:e11461. doi: 10.7717/peerj.11461 (PMC8247702; doi:10.7717/peerj.11461)
Supplement: Supplemental Information 1 [file peerj-09-11461-s001.xlsx]

## Sheet: RB928064 - SS
	Biological Sample 1
		POLI
	Sample	CT MEDIUM	Stand. Dev.
	RB928064_Control_leaves	16.14	0.08
	RB928064_Aluminum_leaves	16.62	0.01
	RB928064_Control_Roots	19.14	0.13
	RB928064_Aluminum_Roots	19.29	0.06
		SS			SS	∆Ct	∆∆Ct	2^∆∆Ct	Sample
	Sample	CT MEDIUM	Stand. Dev.								Control leaves	Aluminum leaves	T-test
	RB928064_Control _leaves	23.32	0.02		RB928064_Control _leaves	7.18	0	1	RB928064_Control _leaves		1	0.8	0.86
	RB928064_Aluminum_leaves	24.13	0.13		RB928064_Aluminum_leaves	7.51	0.33	0.795536	RB928064_Aluminum_leaves		1	1.13
	RB928064_Control_roots	26.5	0.02		RB928064_Control_roots	7.36	0	1	RB928064_Control_roots
	RB928064_Aluminum_roots	28.34	0.07		RB928064_Aluminum_roots	9.05	1.69	0.309927	RB928064_Aluminum_roots		Control roots	Aluminum roots	T-test
											1	0.31	0.03
											1	0.38
	Biological Sample 2 (repetition)
		Poli
	Sample	CT MEDIUM	DESV.pad
	RB928064_Control_leaves	16.67	0.09
	RB928064_Aluminum_leaves	17.46	0.01
	RB928064_Control_roots	19.8	0.13
	RB928064_Aluminum_roots	19.99	0.08
	RB928064_folha_Testemunha	19.29		0.06							gl	1
	RB928064_folha_Alumínio										Stat t	0.212121
	RB928064_raiz_Testemunha										P(T<=t) uni-caudal	0.433466
	RB928064_raiz_Alumínio										t crítico uni-caudal	6.31375
	RB928064_folha_Testemunha										P(T<=t) bi-caudal	0.866932
	RB928064_folha_Alumínio										t crítico bi-caudal	12.7062
	RB928064_raiz_Testemunha
		SS			SS	∆Ct	∆∆Ct	2^∆∆Ct	Sample
	Sample	CT mean	Standart deviation
	RB928064_Control_leaves	23.57	0.13		Control Leaves	6.9	0	1	RB928064_Control_leaves
	RB928064_Aluminum_leaves	24.18	0.04		Al Leaves	6.72	-0.18	1.13288	RB928064_Aluminum_leaves
	RB928064_Control_roots	26.81	0.09		Control Roots	7.01	0	1	RB928064_Control_roots
	RB928064_Aluminum_roots	28.38	0.05		Al Roots	8.39	1.38	0.384219	RB928064_Aluminum_roots
	Biological Sample Mean
	SAMPLE	SS
		2^∆∆Ct of biological samples	Stand. Dev.
	RB928064_Control_leaves	1	0
	RB928064_Aluminum_leaves	0.96421	0.168674
	RB928064_Control_roots	1	0
	RB928064_Aluminum_roots	0.347073	0.0371459

## Sheet: RB935744 - SS
	Biological Sample 2
		POLI
	Sample	CT MEDIUM	Stand. Dev.
	RB935744_Control_leaves	18.41	0
	RB935744_Aluminum_leaves	16.64	0.01
	RB935744_Control_roots	15.94	0.07
	RB935744_Aluminum_roots	17.46	0.04
		SS			SS	∆Ct	∆∆Ct	2^∆∆Ct	Sample		Control Leaves	Aluminum Leaves	T-test
	Sample	CT MEDIUM	Stand. Dev.								1	0.74	0.33
	RB935744_Control_leaves	24.16	0.04		RB935744_Control_leaves	5.75	0	1	RB935744_Control_leaves		1	0.93
	RB935744_Aluminum_leaves	22.49	0.02		RB935744_Aluminum_leaves	5.85	0.1	0.933033	RB935744_Aluminum_leaves
	RB935744_Control_roots	23.88	0.07		RB935744_Control_roots	7.94	0	1	RB935744_Control_roots		Control Roots	Aluminum Roots	T-test
	RB935744_Aluminum_roots	24.38	0.06		RB935744_Aluminum_roots	6.92	-1.02	2.02792	RB935744_Aluminum_roots		1	2.03	0.06
											1	2.25
	Biological Sample (repetition)
		POLI
	Sample	CT MEDIUM	Stand. Dev.
	RB935744_Control_leaves	18.69	0.12
	RB935744_Aluminum_leaves	16.72	0.02
	RB935744_Control_roots	15.74	0.09
	RB935744_Aluminum_roots	17.51	0.1
		SS			SS	∆Ct	∆∆Ct	2^∆∆Ct	Sample
	Sample	CT MEDIUM	Stand. Dev.
	RB935744_Control_leaves	24.22	0.01		RB935744_Control_leaves	5.53	0	1	RB935744_Control_leaves
	RB935744_Aluminum_leaves	22.69	0.01		RB935744_Aluminum_leaves	5.97	0.44	0.737135	RB935744_Aluminum_leaves
	RB935744_Control_roots	23.89	0		RB935744_Control_roots	8.15	0	1	RB935744_Control_roots
	RB935744_Aluminum_roots	24.49	0.05		RB935744_Aluminum_roots	6.98	-1.17	2.25012	RB935744_Aluminum_roots
	Biological Samples Mean
	SAMPLE	SS
		2^∆∆Ct of biological samples	Stand. Dev
	RB935744_leaves_Control	1	0
	RB935744_leaves_Aluminum	0.835084	0.0979492
	RB935744_roots_Control	1	0
	RB935744_roots_Aluminum	2.13902	0.111099

## Sheet: RB867515 - SS
	Biological Sample 1
		POLI
	Sample	CT MEDIUM	Satnd. Dev.
	RB867515_Control_leaves	19.11	0.03
	RB867515_Aluminum_leaves	18	0.1
	RB867515_Control_roots	20.2	0.08
	RB867515_Aluminum_roots	19.11	0.04
		SS			SS	∆Ct	∆∆Ct	2^∆∆Ct	Sample				Control leaves	Aluminum leaves	T-test
	Sample	CT MEDIUM	Stand. Dev.										1	1.46	0.88
	RB867515_Control_leaves	26.84	0.06		RB867515_Control_leaves	7.73	0	1	RB935744_Control_leaves				1	0.68
	RB867515_Aluminum_leaves	25.18	0.02		RB867515_Aluminum_leaves	7.18	-0.55	1.46409	RB935744_Aluminum_leaves
	RB867515_Control_roots	28.93	0		RB867515_Control_roots	8.73	0	1	RB935744_Control_roots				Control roots	Aluminum roots	T-test
	RB867515_Aluminum_roots	27.24	0.01		RB867515_Aluminum_roots	8.13	-0.6	1.51572	RB935744_Aluminum_roots				1	1.52	0.29
													1	2.53
	Biological Samples 2
		POLI
	Sample	CT MEDIUM	Stand. Dev.
	RB867515_Control_leaves	15.92	0.02
	RB867515_Aluminum_leaves	16.72	0.03
	RB867515_Control_roots	22.8	0.12
	RB867515_Aluminum_roots	20	0
		SS			SS	∆Ct	∆∆Ct	2^∆∆Ct	Sample
	Sample	CT MEDIUM	Stand. Dev.
	RB867515_Control_leaves	23.34	0.09		RB867515_Control_leaves	7.42	0	1	RB935744_Control_leaves
	RB867515_Aluminum_leaves	24.69	0.12		RB867515_Aluminum_leaves	7.97	0.55	0.68302	RB935744_Aluminum_leaves
	RB867515_Control_roots	33.01	0.04		RB867515_Control_roots	10.21	0	1	RB935744_Control_roots
	RB867515_Aluminum_roots	28.87	0.02		RB867515_Aluminum_roots	8.87	-1.34	2.53151	RB935744_Aluminum_roots
	Biological Samples Mean
	SAMPLE	SS
		2^∆∆Ct of biological samples	Stand. Dev.
	RB867515_Control_leaves	1	0
	RB867515_Aluminum_leaves	1.07355	0.390533
	RB867515_Control_roots	1	0
	RB867515_Aluminum_roots	2.02361	0.507898

## Sheet: RB928064 - MD
	Biological Sample 1
		POLI
	Sample	CT MEDIUM	Stand. Dev.
	RB928064_Control_leaves	16.41	0.01
	RB928064_Aluminum_leaves	16.25	0.05
	RB928064_Control_roots	17.79	0.03
	RB928064_Aluminum_roots	18.18	0.02
		MD			SS	∆Ct	∆∆Ct	2^∆∆Ct	Sample				Control leaves	Aluminum leaves	T-test
	Sample	CT MEDIUM	Stand. Dev.										1	2.6	0.47
	RB928064_Control_leaves	26.3	0.08		RB928064_Control_leaves	9.89	0	1	RB935744_Control_leaves				1	1.06
	RB928064_Aluminum_leaves	24.76	0.11		RB928064_Aluminum_leaves	8.51	-1.38	2.60268	RB935744_Aluminum_leaves
	RB928064_Control_roots	29.44	0.05		RB928064_Control_roots	11.65	0	1	RB935744_Control_roots				Control roots	Aluminum roots	T-test
	RB928064_Aluminum_roots	31.16	0.11		RB928064_Aluminum_roots	12.98	1.33	0.397768	RB935744_Aluminum_roots				1	0.4	0.53
													1	1.03
	Biological Sample 2
		POLI
	Sample	CT MEDIUM	Stand. Dev.
	RB928064_Control_leaves	16.57	0
	RB928064_Aluminum_leaves	16.38	0.04
	RB928064_Control_roots	17.77	0.05
	RB928064_Aluminum_roots	18.17	0.06
		MD			MD	∆Ct	∆∆Ct	2^∆∆Ct	Sample
	Sample	CT MEDIUM	Stand. Dev.
	RB928064_Control_leaves	26.47	0.01		RB928064_Control_leaves	9.9	0	1	RB935744_Control_leaves
	RB928064_Aluminum_leaves	24.84	0.05		RB928064_Aluminum_leaves	8.46	-1.44	2.71321	RB935744_Aluminum_leaves
	RB928064_Control_roots	29.47	0.05		RB928064_Control_roots	11.7	0	1	RB935744_Control_roots
	RB928064_Aluminum_roots	31.15	0.06		RB928064_Aluminum_roots	12.98	1.28	0.411796	RB935744_Aluminum_roots
	Biological Samples Mean
	SAMPLE	MD
		2^∆∆Ct of biological samples	Stand. Dev.
	RB928064_Control_leaves	1	0
	RB928064_Aluminum_leaves	2.65795	0.0552625
	RB928064_Control_roots	1	0
	RB928064_Aluminum_roots	0.404782	0.00701363

## Sheet: RB935744 - MD
	Biological Sample 1
		POLI
	Sample	CT MEDIUM	Stand. Dev.
	RB935744_Control_leaves	16.07	0.02
	RB935744_Aluminum_leaves	17.24	0.04
	RB935744_Control_roots	16.14	0.08
	RB935744_Aluminum_roots	19.93	0.04
		MD			SS	∆Ct	∆∆Ct	2^∆∆Ct	Sample				Control leaves	Aluminum leaves	T-test
	Sample	CT MEDIUM	Stand. Dev.										1	2.38	0.12
	RB935744_Control_leaves	27.06	0.02		RB935744_Control_leaves	10.99	0	1	RB935744_Control_leaves				1	1.97
	RB935744_Aluminum_leaves	26.98	0.03		RB935744_Aluminum_leaves	9.74	-1.25	2.37841	RB935744_Aluminum_leaves
	RB935744_Control_roots	26.18	0.03		RB935744_Control_roots	10.04	0	1	RB935744_Control_roots				Control roots	Aluminum roots	T-test
	RB935744_Aluminum_roots	31.89	0.05		RB935744_Aluminum_roots	11.96	1.92	0.264255	RB935744_Aluminum_roots				1	0.26	0.016
													1	0.22
	Biological Sample 2
		POLI
	Sample	CT MEDIUM	Stand. Dev.
	RB935744_Control_leaves	16.16	0
	RB935744_Aluminum_leaves	17.24	0.05
	RB935744_Control_roots	16.2	0.06
	RB935744_Aluminum_roots	20.1	0.03
		MD			SS	∆Ct	∆∆Ct	2^∆∆Ct	Sample
	Sample	CT MEDIUM	Stand. Dev.
	RB935744_Control_leaves	26.67	0.1		RB935744_Control_leaves	10.51	0	1	RB935744_Control_leaves
	RB935744_Aluminum_leaves	26.77	0.02		RB935744_Aluminum_leaves	9.53	-0.98	1.97247	RB935744_Aluminum_leaves
	RB935744_Control_roots	25.9	0.01		RB935744_Control_roots	9.7	0	1	RB935744_Control_roots
	RB935744_Aluminum_roots	31.97	0.12		RB935744_Aluminum_roots	11.87	2.17	0.222211	RB935744_Aluminum_roots
	Biological Samples Mean
	SAMPLE	SS
		2^∆∆Ct of biological samples	Stand. Dev.
	RB935744_Control_leaves	1	0
	RB935744_Aluminum_leaves	2.17544	0.202974
	RB935744_Control_roots	1	0
	RB935744_Aluminum_roots	0.243233	0.0210219

## Sheet: RB867515 - MD
	Biological Sample 1
		POLI
	Sample	CT MEDIUM	Stand. Dev.
	RB867515_Control_leaves	15.93	0.03
	RB867515_Aluminum_leaves	16.54	0.05
	RB867515_Control_roots	22.4	0.25
	RB867515_Aluminum_roots	19.79	0.05
		MD			SS	∆Ct	∆∆Ct	2^∆∆Ct	Sample					Control leaves	Aluminum leaves	T-test
	Sample	CT MEDIUM	Stand. Dev.											1	0.12	0.007
	RB867515_Control_leaves	25.52	0.07		RB867515_Control_leaves	9.59	0	1	RB935744_Control_leaves					1	0.14
	RB867515_Aluminum_leaves	29.2	0.03		RB867515_Aluminum_leaves	12.66	3.07	0.11908	RB935744_Aluminum_leaves
	RB867515_Control_roots	34.7	0.32		RB867515_Control_roots	12.3	0	1	RB935744_Control_roots					Control roots	Aluminum roots	T-test
	RB867515_Aluminum_roots	30.29	0		RB867515_Aluminum_roots	10.5	-1.8	3.4822	RB935744_Aluminum_roots					1	3.48	0.03
														1	3.23
	Biological Sample 2
		POLI
	Sample	CT MEDIUM	Stand. Dev.
	RB867515_Control_leaves	16.14	0.02
	RB867515_Aluminum_leaves	17.06	0.08
	RB867515_Control_roots	22.32	0.17
	RB867515_Aluminum_roots	19.89	0.12
		MD			SS	∆Ct	∆∆Ct	2^∆∆Ct	Sample
	Sample	CT MEDIUM	Stand. Dev.
	RB867515_Control_leaves	25.7	0.14		RB867515_Control_leaves	9.56	0	1	RB935744_Control_leaves
	RB867515_Aluminum_leaves	29.48	0.03		RB867515_Aluminum_leaves	12.42	2.86	0.137738	RB935744_Aluminum_leaves
	RB867515_Control_roots	34.46	0.41		RB867515_Control_roots	12.14	0	1	RB935744_Control_roots
	RB867515_Aluminum_roots	30.34	0.11		RB867515_Aluminum_roots	10.45	-1.69	3.22657	RB935744_Aluminum_roots
	Biological Samples Mean
	SAMPLE	SS
		2^∆∆Ct of biological samples	Stand. Dev.
	RB867515_Control_leaves	1	0
	RB867515_Aluminum_leaves	0.128409	0.00932919
	RB867515_Control_roots	1	0
	RB867515_Aluminum_roots	3.35438	0.127818

## Sheet: RB928064 - SD
	Biological Sample 1
		POLI
	Sample	CT MEDIUM	Stand. Dev.
	RB867515_Control_leaves	16.41	0.01
	RB867515_Aluminum_leaves	16.25	0.05
	RB867515_Control_roots	17.79	0.03
	RB867515_Aluminum_roots	18.18	0.02
		SD			SS	∆Ct	∆∆Ct	2^∆∆Ct	Sample				Control leaves	Aluminum leaves	T-test
	Sample	CT MEDIUM	Stand. Dev.										1	1.22	0.014
	RB867515_Control_leaves	22.3	0.04		RB867515_Control_leaves	5.89	0	1	RB935744_Control_leaves				1	1.21
	RB867515_Aluminum_leaves	21.85	0.03		RB867515_Aluminum_leaves	5.6	-0.29	1.22264	RB935744_Aluminum_leaves
	RB867515_Control_roots	26.97	0.01		RB867515_Control_roots	9.18	0	1	RB935744_Control_roots				Control roots	Aluminum roots	T-test
	RB867515_Aluminum_roots	26.96	0.07		RB867515_Aluminum_roots	8.78	-0.4	1.31951	RB935744_Aluminum_roots				1	1.32	0.031
													1	1.29
	Biological Sample 2
		POLI
	Sample	CT MEDIUM	Stand. Dev.
	RB867515_Control_leaves	16.57	0
	RB867515_Aluminum_leaves	16.38	0.04
	RB867515_Control_roots	17.77	0.05
	RB867515_Aluminum_roots	18.17	0.06
		SD			SS	∆Ct	∆∆Ct	2^∆∆Ct	Sample
	Sample	CT MEDIUM	Stand. Dev.
	RB867515_Control_leaves	22.3	0.11		RB867515_Control_leaves	5.73	0	1	RB935744_Control_leaves
	RB867515_Aluminum_leaves	21.84	0.08		RB867515_Aluminum_leaves	5.46	-0.27	1.20581	RB935744_Aluminum_leaves
	RB867515_Control_roots	26.94	0.01		RB867515_Control_roots	9.17	0	1	RB935744_Control_roots
	RB867515_Aluminum_roots	26.97	0.11		RB867515_Aluminum_roots	8.8	-0.37	1.29235	RB935744_Aluminum_roots
	Biological Samples Mean
	SAMPLE	SS
		2^∆∆Ct of biological samples	Stand. Dev.
	RB867515_Control_leaves	1	0
	RB867515_Aluminum_leaves	1.21422	0.00841623
	RB867515_Control_roots	1	0
	RB867515_Aluminum_roots	1.30593	0.0135775

## Sheet: RB935744 - SD
	Biological Sample 1
		POLI
	Sample	CT MEDIUM	Stand. Dev.
	RB867515_Control_leaves	16.07	0.02
	RB867515_Aluminum_leaves	17.24	0.04
	RB867515_Control_roots	16.14	0.08
	RB867515_Aluminum_roots	19.93	0.04
		SD			SS	∆Ct	∆∆Ct	2^∆∆Ct	Sample					Control leaves	Aluminum roots	T-test
	Sample	CT MEDIUM	Stand. Dev.											1	2.87	0.045
	RB867515_Control_leaves	22.71	0.09		RB867515_Control_leaves	6.64	0	1	RB935744_Control_leaves					1	2.62
	RB867515_Aluminum_leaves	22.36	0		RB867515_Aluminum_leaves	5.12	-1.52	2.86791	RB935744_Aluminum_leaves
	RB867515_Control_roots	22.91	0.02		RB867515_Control_roots	6.77	0	1	RB935744_Control_roots					Control roots	Aluminum leaves	T-test
	RB867515_Aluminum_roots	27.54	0.05		RB867515_Aluminum_roots	7.61	0.84	0.558644	RB935744_Aluminum_roots					1	0.56	0.014
														1	0.54
	Biological Sample 2
		POLI
	Sample	CT MEDIUM	Stand. Dev.
	RB867515_Control_leaves	16.16	0
	RB867515_Aluminum_leaves	17.24	0.05
	RB867515_Control_roots	16.2	0.06
	RB867515_Aluminum_roots	20.1	0.03
		SD			SS	∆Ct	∆∆Ct	2^∆∆Ct	Sample
	Sample	CT MEDIUM	Stand. Dev.
	RB867515_Control_leaves	22.57	0.09		RB867515_Control_leaves	6.41	0	1	RB935744_Control_leaves
	RB867515_Aluminum_leaves	22.26	0.08		RB867515_Aluminum_leaves	5.02	-1.39	2.62079	RB935744_Aluminum_leaves
	RB867515_Control_roots	22.59	0.01		RB867515_Control_roots	6.39	0	1	RB935744_Control_roots
	RB867515_Aluminum_roots	27.37	0		RB867515_Aluminum_roots	7.27	0.88	0.543367	RB935744_Aluminum_roots
	Biological Samples Mean
	SAMPLE	SS
		2^∆∆Ct of biological samples	Stand. Dev.
	RB867515_Control_leaves	1	0
	RB867515_Aluminum_leaves	2.74435	0.123562
	RB867515_Control_roots	1	0
	RB867515_Aluminum_roots	0.551006	0.00763807

## Sheet: RB867515 - SD
	Biological Sample 1
		POLI
	Sample	CT MEDIUM	Stand. Dev.
	RB867515_Control_leaves	15.93	0.03
	RB867515_Aluminum_leaves	16.54	0.05
	RB867515_Control_roots	22.4	0.25
	RB867515_Aluminum_roots	19.79	0.05
		SD			SD	∆Ct	∆∆Ct	2^∆∆Ct	Sample				Control leaves	Aluminum leaves	T-test
	Sample	CT MEDIUM	Stand. Dev.										1	0.12	0.014
	RB867515_Control_leaves	22.09	0.02		RB867515_Control_leaves	6.16	0	1	RB935744_Control_leaves				1	0.16
	RB867515_Aluminum_leaves	25.8	0.01		RB867515_Aluminum_leaves	9.26	3.1	0.116629	RB935744_Aluminum_leaves
	RB867515_Control_roots	32.54	0.01		RB867515_Control_roots	10.14	0	1	RB935744_Control_roots				Control roots	Aluminum roots	T-test
	RB867515_Aluminum_roots	28.59	0.06		RB867515_Aluminum_roots	8.8	-1.34	2.53151	RB935744_Aluminum_roots				1	2.53	0.08
													1	2.19
	Biological Sample 2
		POLI
	Sample	CT MEDIUM	Stand. Dev.
	RB867515_Control_leaves	16.14	0.02
	RB867515_Aluminum_leaves	17.06	0.08
	RB867515_Control_roots	22.32	0.17
	RB867515_Aluminum_roots	19.89	0.12
		SD			SD	∆Ct	∆∆Ct	2^∆∆Ct	Sample
	Sample	CT MEDIUM	Stand. Dev.
	RB867515_Control_leaves	22.17	0.05		RB867515_Control_leaves	6.03	0	1	RB935744_Control_leaves
	RB867515_Aluminum_leaves	25.73	0.01		RB867515_Aluminum_leaves	8.67	2.64	0.160428	RB935744_Aluminum_leaves
	RB867515_Control_roots	31.93	0.19		RB867515_Control_roots	9.61	0	1	RB935744_Control_roots
	RB867515_Aluminum_roots	28.37	0.02		RB867515_Aluminum_roots	8.48	-1.13	2.18859	RB935744_Aluminum_roots
	Biological Samples Mean
	SAMPLE	SD
		2^∆∆Ct of biological samples	Stand. Dev.
	RB867515_Control_leaves	1	0
	RB867515_Aluminum_leaves	0.138529	0.0218996
	RB867515_Control_roots	1	0
	RB867515_Aluminum_roots	2.36005	0.171463

## Sheet: Plan1
SDH	2^∆∆Ct of biological samples	Stand. Dev.		Control Leaves
RB928064_Control_leaves	1	0		Al Leaves	Al Leaves	Al Leaves
RB928064_Control_roots	1	0		Control Roots
RB928064_Aluminum_leaves	0.96421	0.168674		Al Roots	Al Roots	Al Roots
RB928064_Aluminum_roots	0.347073	0.0371459	*
MDH	2^∆∆Ct of biological samples	Stand. Dev.
RB928064_Control_leaves	1	0
RB928064_Aluminum_leaves	2.658	0.0552625
RB928064_Control_roots	1	0
RB928064_Aluminum_roots	0.405	0.00701363
SOD	2^∆∆Ct of biological samples	Stand. Dev.
RB928064_Control_leaves	1	0
RB928064_Aluminum_leaves	1.21422	0.00841623	*
RB928064_Control_roots	1	0
RB928064_Aluminum_roots	1.30593	0.0135775	*
POLI
SDH	2^∆∆Ct of biological samples	Stand. Dev.
RB935744_Control_leaves	1	0
RB935744_Aluminum_leaves	0.835084	0.0979492
RB935744_Control_roots	1	0
RB935744_Aluminum_roots	2.13902	0.111099
MDH	2^∆∆Ct of biological samples	Stand. Dev.
RB935744_Control_leaves	1	0
RB935744_Aluminum_leaves	2.17544	0.202974
RB935744_Control_roots	1	0
RB935744_Aluminum_roots	0.243233	0.0210219	*
SOD	2^∆∆Ct of biological samples	Stand. Dev.
RB935744_Control_leaves	1	0
RB935744_Aluminum_leaves	2.74435	0.123562	*
RB935744_Control_roots	1	0	*
RB935744_Aluminum_roots	0.551006	0.00763807
SDH	2^∆∆Ct of biological samples	Stand. Dev.
RB867515_Control_leaves	1	0
RB867515_Aluminum_leaves	1.07355	0.390533
RB867515_Control_roots	1	0
RB867515_Aluminum_roots	2.02361	0.507898
MDH	2^∆∆Ct of biological samples	Stand. Dev.
RB867515_Control_leaves	1	0
RB867515_Aluminum_leaves	0.128409	0.00932919	*
RB867515_Control_roots	1	0
RB867515_Aluminum_roots	3.35438	0.127818	*
SOD	2^∆∆Ct of biological samples	Stand. Dev.
RB867515_Control_leaves	1	0
RB867515_Aluminum_leaves	0.138529	0.0218996	*
RB867515_Control_roots	1	0
RB867515_Aluminum_roots	2.36005	0.171463

[truncated: 1 more sheets: Plan2]
