# Supplementary material for: Physiological, nutritional, and molecular responses of Brazilian sugarcane cultivars under stress by aluminum
Source: PeerJ. 2021 Jun 28;9:e11461. doi: 10.7717/peerj.11461 (PMC8247702; doi:10.7717/peerj.11461)
Supplement: Supplemental Information 2 [file peerj-09-11461-s002.xlsx]

## Sheet: Plan1
Aluminum content in roots and sugarcane leaves grown in greenhouse - treatment with aluminum and control
Treatment	Code	Reading	Dilution	Aluminum mg/kg		Calibration Curve
928064-T-F	1F	141	6x	158.399		Al content	Reading
928064-T-F	2F	284		52.899		0	0
928064-T-F	4F	280		52.1578		1	50
928064-AL-F	7F	374		69.5768		2	111
928064-AL-F	8F	242		45.1161		3	156
928064-AL-F	10F	175		32.7004		4	215
935744-T-F	12F	152		28.4383		5	266
935744-T-F	12F	199		37.1478		6	325
935744-T-F	15F	121		22.6937
935744-AL-F	19F	144		26.9558
935744-AL-F	19F	155		28.9942
867515-T-F	21F	110		20.6553
867515-T-F	21F	123		23.0643
867515-T-F	25F	135		25.288
867515-AL-F	28F	130		24.3615
867515-AL-F	28F	157		29.3648
928064-T-R	5R	356	6x	397.448
928064-T-R	5R	398	6x	444.145
928064-AL-R	6R	404	6x	450.816
928064-AL-R	6R	361	6x	403.007
935744-T-R	11R	389	6x	434.139
935744-T-R	11R	390	6x	435.251		928064 Roots		928064 Leaves				935744 Roots					935744 Leaves
935744-T-R	12R	385	6x	429.691		397.44		52				478.61					28.43						867515 Leaves						867515 Roots
935744-AL-R	18R	429	6x	478.613		444.14		52.89				527.53					37.14							20.65
935744-AL-R	18R	473	6x	527.534		420.79		52.15				503.07					22.69							23.06						418.57
867515-T-R	22R	375	6x	418.573		450.81		69.57				434.13					26.95							25.28						498.62
867515-T-R	22R	447	6x	498.626		403		45.11				435.25					28.99							24.36						517.52
867515-T-R	23R	464	6x	517.528		426.91		32.7				429.69					27.97							29.36						533.09
867515-AL-R	26R	478	6x	533.094		Column1			Column1															26.86						533.09
867515-AL-R	28R	478	6x	533.094								Column1																		568.67
867515-AL-R	29R	510	6x	568.673		Mean	423.848		Mean	50.7367														Column 1
						Standart Error	8.73587		Standart Error	4.89866		Mean	28.695																	Column1			Column1
						Median	423.85		Median	52.075		Standart Error	1.92446											Mean	24.9283
						Mode	#N/A		Mode	#N/A		Median	28.2											Standart Error	1.23305					Mean	511.593		Mean	544.95
						Standart Deviation	21.3984		Standart Deviation	11.9992		Mode	#N/A											Median	24.82					Standart Error	20.8476		Standart Error	11.86
						Sample Variance	457.893		Sample Variance	143.981		Standart Deviation	4.71394											Mode	#N/A					Median	525.305		Median	533.09
						Kurtosis	-1.66459		Kurtosis	1.60655		Sample Variance	22.2212											Standart Deviation	3.02035					Mode	533.09		Mode	533.09
						Assimetry	0.0145601		Assimetry	0.112705		Kurtosis	2.81738											Sample Variance	9.1225					Standart Deviation	51.0661		Standart Deviation	20.5421
						Gap	53.37		Gap	36.87		Assimetry	1.08846											Kurtosis	0.0332257					Sample Variance	2607.75		Sample Variance	421.979
						Minimum	397.44		Minimum	32.7		Gap	14.45											Assimetry	0.100945					Kurtosis	2.59733		Kurtosis	#DIV/0!
						Maximum	450.81		Maximum	69.57		Minimum	22.69											Gap	8.71					Assimetry	-1.35423		Assimetry	1.73205
						Sum	2543.09		Sum	304.42		Maximum	37.14											Minimum	20.65					Gap	150.1		Gap	35.58
						Count	6		Count	6		Sum	172.17											Maximum	29.36					Minimum	418.57		Minimum	533.09
												Count	6											Sum	149.57					Maximum	568.67		Maximum	568.67
																								Count	6					Sum	3069.56		Sum	1634.85
																														Count	6		Count	3

## Sheet: Plan2
Treatment	Code	Reading	Dilution	Aluminum mg/kg
928064-T-F	1F	141	6x	158.399
928064-T-F	2F	284		52.899			928064 T	52.5284
928064-T-F	4F	280		52.1578			928064 Al	49.1311
928064-AL-F	7F	374		69.5768
928064-AL-F	8F	242		45.1161			935744 T	29.4266
928064-AL-F	10F	175		32.7004
935744-T-F	12F	152		28.4383
935744-T-F	12F	199		37.1478
935744-T-F	15F	121		22.6937
935744-AL-F	19F	144		26.9558
935744-AL-F	19F	155		28.9942
				27.975
867515-T-F	21F	110		20.6553
867515-T-F	21F	123		23.0643
867515-T-F	25F	135		25.288
867515-AL-F	28F	130		24.3615
867515-AL-F	28F	157		29.3648
				26.8632
928064-T-R	5R	356	6x	397.448
928064-T-R	5R	398	6x	444.145
				420.796
928064-AL-R	6R	404	6x	450.816
928064-AL-R	6R	361	6x	403.007
				426.912
935744-T-R	11R	389	6x	434.139
935744-T-R	11R	390	6x	435.251
935744-T-R	12R	385	6x	429.691
935744-AL-R	18R	429	6x	478.613
935744-AL-R	18R	473	6x	527.534
				503.073
867515-T-R	22R	375	6x	418.573
867515-T-R	22R	447	6x	498.626
867515-T-R	23R	464	6x	517.528
867515-AL-R	26R	478	6x	533.094
867515-AL-R	28R	478	6x	533.094
867515-AL-R	29R	510	6x	568.673
