# Supplementary material for: Physiological, nutritional, and molecular responses of Brazilian sugarcane cultivars under stress by aluminum
Source: PeerJ. 2021 Jun 28;9:e11461. doi: 10.7717/peerj.11461 (PMC8247702; doi:10.7717/peerj.11461)
Supplement: Supplemental Information 3 [file peerj-09-11461-s003.xls]

## Sheet: Plan3
Variety	ADC BioScientific LCpro+ System Serial No.32555	Date	Reading time	Humidity Reference	Humidity	Carbon reference	Carbon Variation	Pair radiation (Leaf)	T Chamber	T leaf		Pressure (atm)	Internal Carbon	Transpiration	Conductance	Photosynthetic Rate (umol/m2*s)	Chamber area
Reading Number		dt	tm	eref	^e	cref	^c	Qleaf	Tch	Tl	u	p	ci	E	gs	A	area	rb	Tl mtd	Q mode
928064-T	3	Feb15/2016	1899-12-31 07:12:32	23.6	10.7	429	93	1305	30.9	33.0	71.8	941	100	1.31	0.08	10.76	6.25	0.50	meas.	climate
928064-T	5	Feb15/2017	1899-12-31 07:16:14	23.6	7.0	426	67	1305	31.2	33.9	70.8	941	1	0.85	0.04	7.79	6.25	0.50	meas.	climate
928064-T	8	Feb15/2018	1899-12-31 07:41:24	25.1	12.1	431	98	1305	33.7	35.9	71.2	941	48	1.47	0.07	11.26	6.25	0.50	meas.	climate
928064-T	9	Feb15/2019	1899-12-31 07:45:32	25.5	12.1	429	76	1305	34.1	37.1	71.2	941	90	1.46	0.06	8.66	6.25	0.50	meas.	climate
928064-T	13	Feb16/2016	1899-12-31 06:57:02	16.9	9.6	420	49	1305	26.7	29.4	70.8	943	245	1.18	0.08	5.71	6.25	0.50	meas.	climate
928064-T	14	Feb16/2017	1899-12-31 06:57:46	17.4	10.3	423	52	1305	26.6	29.4	72.2	943	251	1.26	0.09	6.05	6.25	0.50	meas.	climate
928064-T	15	Feb16/2018	1899-12-31 06:58:12	17.0	10.2	423	70	1305	26.7	29.4	70.8	943	199	1.25	0.09	8.02	6.25	0.50	meas.	climate
928064-T	17	Feb16/2019	1899-12-31 07:59:11	19.8	5.4	416	52	1305	27.8	30.8	71.5	943	72	0.66	0.03	5.98	6.25	0.50	meas.	climate
928064-T	18	Feb16/2020	1899-12-31 08:00:18	19.6	6.1	420	56	1305	27.8	30.9	71.5	943	68	0.74	0.04	6.46	6.25	0.50	meas.	climate
928064 AL	6	Feb16/2021	1899-12-31 07:26:21	23.9	8.9	427	98	1305	32.4	34.5	70.8	941	under		0.05	11.25	6.25	0.50	meas.	climate
928064 AL	7	Feb16/2022	1899-12-31 07:37:39	24.8	10.7	434	110	1305	33.4	36.0	71.5	942	under		0.05	12.52	6.25	0.50	meas.	climate
928064-AL	10	Feb16/2023	1899-12-31 07:52:16	28.5	-3.3	427	27	1305	34.7	35.4	71.2	942	under		over	3.10	6.25	0.50	meas.	climate
928064-AL	11	Feb16/2024	1899-12-31 07:55:07	29.3	3.9	427	56	1305	35.1	35.8	71.2	942	under		0.02	6.38	6.25	0.50	meas.	climate
928064-AL	12	Feb16/2025	1899-12-31 08:23:38	27.6	2.1	395	37	1305	35.4	36.3	70.5	942	under		0.01	4.21	6.25	0.50	meas.	climate
867515-T	23	Feb16/2016	1899-12-31 08:16:52	20.0	6.5	400	30	1305	27.8	29.5	71.2	944	246	0.79	0.05	3.47	6.25	0.50	meas.	climate
867515-T	24	Feb16/2017	1899-12-31 08:21:49	20.4	5.4	402	41	1305	27.9	31.8	69.8	944	92	0.65	0.03	4.71	6.25	0.50	meas.	climate
867515-T	25	Feb16/2018	1899-12-31 08:22:57	20.5	6.8	401	55	1305	27.9	31.9	70.1	943	76	0.82	0.04	6.28	6.25	0.50	meas.	climate
867515-Al	19	Feb16/2019	1899-12-31 08:05:18	19.7	5.5	404	24	1305	27.7	30.3	71.2	944	243	0.66	0.03	2.69	6.25	0.50	meas.	climate
867515-Al	20	Feb16/2020	1899-12-31 08:05:44	19.6	5.1	404	37	1305	27.7	30.3	71.5	944	144	0.61	0.03	4.21	6.25	0.50	meas.	climate
867515-Al	21	Feb16/2021	1899-12-31 08:10:28	20.1	6.2	403	53	1305	27.6	30.8	70.5	944	89	0.75	0.04	5.96	6.25	0.50	meas.	climate
867515-Al	22	Feb16/2022	1899-12-31 08:11:40	19.7	8.3	403	82	1305	27.6	30.6	70.5	943	65	1.00	0.06	9.42	6.25	0.50	meas.	climate
867515-AL	33	Feb16/2023	1899-12-31 08:50:25	24.7	4.7	403	51	1305	29.5	32.8	71.5	944	under	0.57	0.03	5.89	6.25	0.50	meas.	climate
867515-AL	34	Feb16/2024	1899-12-31 09:02:46	27.2	7.0	388	65	1305	31.5	34.7	70.1	943	under	0.84	0.04	7.45	6.25	0.50	meas.	climate
935744-T	26	Feb16/2016	1899-12-31 08:36:40	22.1	6.5	411	68	1305	28.5	31.0	69.8	943	70	0.78	0.05	7.80	6.25	0.50	meas.	climate
935744-T	27	Feb16/2017	1899-12-31 08:37:21	22.2	7.1	416	73	1305	28.5	31.7	69.8	944	49	0.86	0.05	8.35	6.25	0.50	meas.	climate
935744-T	28	Feb16/2018	1899-12-31 08:37:58	22.2	7.6	416	82	1305	28.5	32.0	69.8	943	23	0.93	0.05	9.39	6.25	0.50	meas.	climate
935744-T	29	Feb16/2019	1899-12-31 08:38:22	22.4	7.6	416	82	1305	28.5	32.3	71.2	943	23	0.93	0.05	9.39	6.25	0.50	meas.	climate
935744-AL	30	Feb16/2020	1899-12-31 08:42:50	23.0	5.8	411	69	1305	28.7	31.8	71.5	944	under	0.70	0.04	7.82	6.25	0.50	meas.	climate
935744-AL	31	Feb16/2021	1899-12-31 08:43:32	23.2	5.6	413	71	1305	28.8	32.1	69.5	944	under	0.67	0.04	8.03	6.25	0.50	meas.	climate
935744-AL	32	Feb16/2022	1899-12-31 08:44:08	23.2	6.2	413	78	1305	28.8	32.0	69.1	944	under	0.75	0.04	8.92	6.25	0.50	meas.	climate
