# Supplementary material for: Physiological, nutritional, and molecular responses of Brazilian sugarcane cultivars under stress by aluminum
Source: PeerJ. 2021 Jun 28;9:e11461. doi: 10.7717/peerj.11461 (PMC8247702; doi:10.7717/peerj.11461)
Supplement: Supplemental Information 4 [file peerj-09-11461-s004.xls]

## Sheet: Plan1
	FEDERAL UNIVERSITY OF SÃO CARLOS
	Center of Agriculture Sciences – Department of Natural Resources and Environmental Protection- Highway Anhangüera Km 174, Mailbox: 153 Zip Code 13.600-970 Araras/SP Phone/Fax: (19) 3543-2681
						SOIL FERTILITY ASSESSMENT PROGRAM
CHEMICAL PLANT ANALYSIS
REQUESTER: MARIANE							DATE: 03 / 16 / 2016
SAMPLE Nº		N	P	K	Ca	Mg	S
LAB.	REQ.	g/Kg
241	Leave 928064	18	1.0513	11.6471	5.78785	2.54205	1.66396
242	Control	16.5	0.91465	16.6941	6.73968	2.77562	2.94006
243		14	0.76661	11.2588	4.74365	2.13794	1.71665
		15.5	0.83	12.5	5.85	2.51	2.32
		17	0.94	13.5	5.58	2.48	1.86
244	Leave 928064	12	0.834937	11.6471	4.3675	1.88877	1.8864
245	Al Treatment	14.5	0.755223	11.2588	4.32583	1.83903	2.07372
246		14	0.675509	10.0941	4.35332	2.139	1.38884
		13.78	0.85	11.5	4.36	2.05	1.55
		14.82	0.73	11	4.34	1.88	2
247	Leave 935744	19	1.00575	8.15294	4.94275	2.73486	1.17225
248	Control	19.5	1.04	8	5.01	2.98	1.24
249		18.75	0.93	8.75	4.78	2.25	1.32
		20.13	1.09	7.8	5.13	2.78	1.01
		17.15	1	8.03	4.84	2.91	1.11
250	Leave 935744	16.5	1.1424	7.76471	4.919	2.82733	1.23664
251	Al Treatment	18	1.32461	8.54118	2.95477	1.5622	1.05518
252		18.22	1.25	8.08	3.25	2.25	1.17
		17.13	1.18	7.98	4.53	1.89	1.08
		16.8	1.3	8.4	4	2.42	1.2
253	Leave 867515	13.5	0.971589	12.8118	3.67805	2.0998	1.7225
254		14	1.1424	10.0941	3.4058	1.50664	1.40055
255		15.16	1.09	11.5	3.57	1.83	1.63
		14.23	1.13	12.53	4.01	2.04	1.39
		12.78	1	10.35	3.03	1.52	1.66
256	Leave 867515	14	1.06269	8.92941	3.09801	1.5324	1.48835
257	Al Treatment	14.23	0.99	9.01	3.25	1.82	1.53
258		13.82	1.1	9.23	3.03	1.48	1.39
		13.55	1.08	8.59	3.13	1.65	1.43
		14.88	1.13	8.93	2.99	1.17	1.61
259	Root 928064	13.5	0.823549	24.4588	3.95176	3.90831	5.58593
260	Control	13.48	0.9	24.38	3.98	3.9	5.62
261		13.5	0.85	24.7	4.01	4.04	5.65
		13.6	0.8	24.4	3.89	3.88	5.54
		13.42	0.73	24.36	3.92	3.8	5.54
262	Root 928064	10.5	0.607182	11.2588	3.21927	1.17704	2.10884
263	Al Treatment	10.52	0.58	11.3	3.25	1.2	2.08
264		10.48	0.6	11.11	2.98	1.25	2.15
		10.55	0.61	11.22	3.2	1.15	2.1
		10.45	0.65	11.41	3.45	1.12	2.11
265	Root 935744	11	0.595795	17.4706	2.9779	3.4199	0.844448
266	Control	9	0.516081	16.6941	3.24349	3.60891	5.35178
267		10.58	0.55	17.25	3.15	3.6	2.5
		10.28	0.62	17.05	2.95	3.45	3.25
		9.14	0.51	16.94	3.23	3.49	3.53
268	Root 935744	6	0.436367	12.8118	1.97162	0.674614	1.59372
269	Al Treatment	6.01	0.45	12.85	2.01	0.65	1.55
270		5.98	0.5	11.99	1.98	0.7	1.62
		5.96	0.42	12.83	2	0.71	1.6
		6.05	0.39	13.57	1.89	0.62	1.59
271	Root 867515	6.5	0.353237	7.37647	2.58191	1.64506	1.90982
272	Control	5	0.231388	6.6	1.99969	1.86824	1.93323
273		5.95	0.4	6.95	2.35	1.8	1.9
		6	0.32	7.4	2.6	1.67	1.95
		5.3	0.15	6.62	1.92	1.81	1.91
274	Root 867515	9	0.265551	8.92941	1.3039	0.687548	1.13128
275	Al Treatment	6	0.345265	9.70588	1.15171	0.434997	1.1664
276		9	0.402204	9.31765	1.70154	0.865725	1.20738
		7.25	0.38	9.25	1.53	0.58	1.15
		8.75	0.3	9.39	1.24	0.75	1.19
