# Supplementary material for: Physiological, nutritional, and molecular responses of Brazilian sugarcane cultivars under stress by aluminum
Source: PeerJ. 2021 Jun 28;9:e11461. doi: 10.7717/peerj.11461 (PMC8247702; doi:10.7717/peerj.11461)
Supplement: Supplemental Information 5 [file peerj-09-11461-s005.xlsx]

## Sheet: Plan1
Chlorophyll a, b, and total analysis
Sample	Treatment	A645	A652	A663
928064	Control	0.056	0.086	0.14
928064	Control	0.056	0.09	0.139
928064	Control	0.057	0.085	0.142
928064	Aluminum	0.146	0.129	0.139
928064	Aluminum	0.15	0.125	0.143
928064	Aluminum	0.151	0.122	0.145
935744	Control	0.135	0.155	0.15
935744	Control	0.13	0.15	0.151
935744	Control	0.132	0.153	0.154
935744	Aluminum	0.098	0.11	0.139
935744	Aluminum	0.11	0.09	0.144
935744	Aluminum	0.107	0.12	0.143
867515	Control	0.168	0.201	0.249
867515	Control	0.176	0.208	0.254
867515	Control	0.181	0.205	0.255
867515	Aluminum	0.113	0.13	0.119
867515	Aluminum	0.114	0.123	0.125
867515	Aluminum	0.11	0.121	0.12
